# Supplementary material for: PARP Traps Rescue the Pro-Inflammatory Response of Human Macrophages in the In Vitro Model of LPS-Induced Tolerance
Source: MDPI journal article supplement (doi:10.3390/ph14020170), 2021-02-22
Supplement: s1 [file s1]

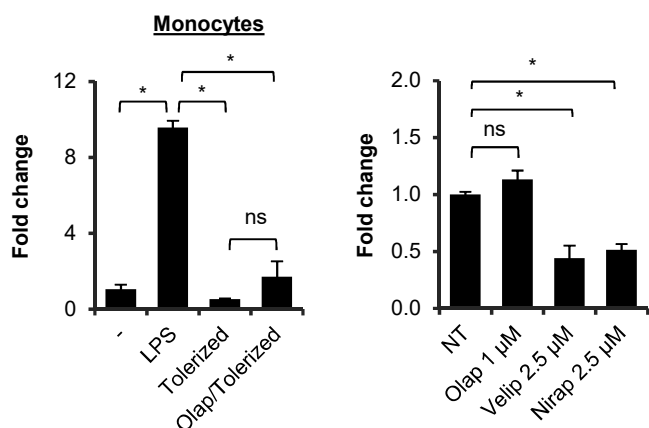

**Figure S1:** The effect of human monocyte treatment with 1μM Olaparib for 1 h prior to induction of tolerance on the transcription of TNFα that was measured by real-time PCR

**Figure S2:** The effect of human macrophage treatment with PARP1 inhibitors 1 h on the transcription of TNFα that was measured by real-time PCR; Abbreviations: Olap—Olaparib, Velip—Veliparib, Nirap—Niraparib, LPS—lipopolysaccharide

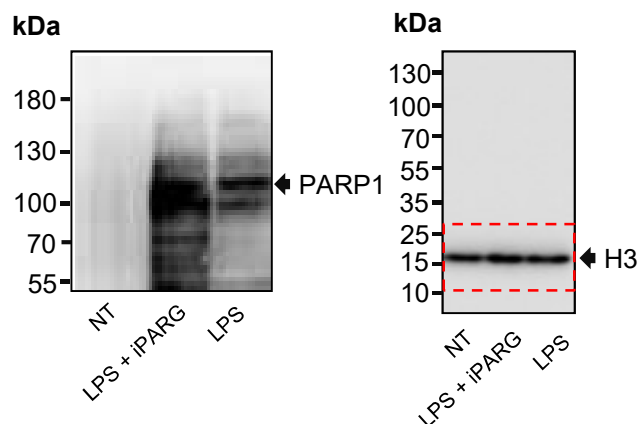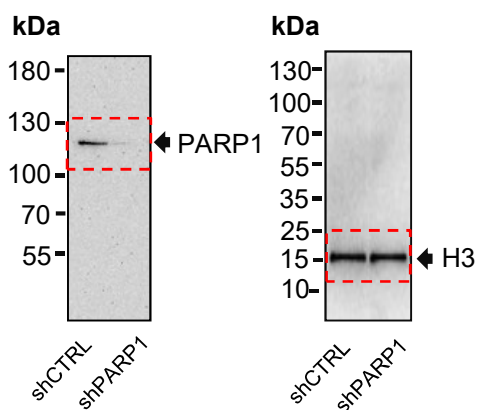

**Figure S4:** The representative full length western blot images of PARP1 and H3 in the PARP1 stable knock-downs; cropped, red rectangular indicate picture areas that are included in the main Figures

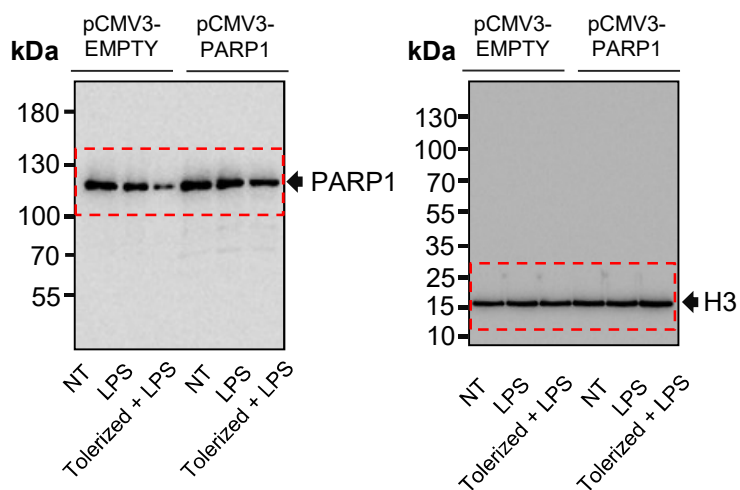

**Figure S5:** The representative full length western blot images of PARP1 and H3 in cells transiently transfected with the PARP1 expressing vector; cropped, red rectangular indicate picture areas that are included in the main Figures
